# Supplementary material
Source: publisher figshare collection journal article supplement (https://karger.figshare.com/ndownloader/files/23844119)
Supplement: Supplementary file 1 [file 23844119]

**Supplementary table 3**. Reference ranges of middle cerebral artery and umbilical artery by exact weeks

|  | **Middle Cerebral Artery** | | | | | **Umbilical artery** | | | | |
| --- | --- | --- | --- | --- | --- | --- | --- | --- | --- | --- |
|  | **5th centile** | **10th centile** | **50th centile** | **90th centile** | **95th centile** | **5th centile** | **10th centile** | **50th centile** | **90th centile** | **95th centile** |
| **24** | 1.41 | 1.48 | 1.88 | 2.27 | 2.35 | 0.89 | 0.94 | 1.15 | 1.43 | 1.53 |
| **25** | 1.44 | 1.50 | 1.93 | 2.33 | 2.42 | 0.87 | 0.92 | 1.13 | 1.41 | 1.50 |
| **26** | 1.46 | 1.53 | 1.96 | 2.38 | 2.47 | 0.85 | 0.90 | 1.11 | 1.38 | 1.47 |
| **27** | 1.47 | 1.54 | 1.98 | 2.41 | 2.50 | 0.83 | 0.88 | 1.09 | 1.36 | 1.45 |
| **28** | 1.48 | 1.55 | 2.00 | 2.44 | 2.53 | 0.81 | 0.86 | 1.07 | 1.34 | 1.42 |
| **29** | 1.48 | 1.55 | 2.00 | 2.45 | 2.54 | 0.79 | 0.84 | 1.05 | 1.32 | 1.39 |
| **30** | 1.48 | 1.55 | 2.00 | 2.44 | 2.54 | 0.77 | 0.82 | 1.02 | 1.30 | 1.37 |
| **31** | 1.47 | 1.54 | 1.98 | 2.43 | 2.52 | 0.75 | 0.80 | 1.00 | 1.27 | 1.35 |
| **32** | 1.46 | 1.52 | 1.96 | 2.40 | 2.50 | 0.73 | 0.78 | 0.98 | 1.25 | 1.32 |
| **33** | 1.44 | 1.50 | 1.92 | 2.36 | 2.46 | 0.72 | 0.76 | 0.96 | 1.23 | 1.30 |
| **34** | 1.41 | 1.47 | 1.88 | 2.31 | 2.40 | 0.69 | 0.74 | 0.94 | 1.21 | 1.28 |
| **35** | 1.38 | 1.44 | 1.83 | 2.24 | 2.34 | 0.67 | 0.72 | 0.92 | 1.19 | 1.26 |
| **36** | 1.34 | 1.40 | 1.77 | 2.16 | 2.26 | 0.65 | 0.70 | 0.90 | 1.17 | 1.24 |
| **37** | 1.29 | 1.35 | 1.69 | 2.07 | 2.16 | 0.63 | 0.68 | 0.88 | 1.15 | 1.22 |
| **38** | 1.24 | 1.30 | 1.61 | 1.96 | 2.06 | 0.61 | 0.66 | 0.86 | 1.13 | 1.21 |
| **39** | 1.19 | 1.24 | 1.52 | 1.85 | 1.94 | 0.59 | 0.64 | 0.84 | 1.11 | 1.19 |
| **40** | 1.12 | 1.17 | 1.42 | 1.71 | 1.81 | 0.57 | 0.62 | 0.82 | 1.09 | 1.17 |
| **41** | 1.06 | 1.10 | 1.31 | 1.57 | 1.66 | 0.55 | 0.60 | 0.80 | 1.07 | 1.16 |
